# Supplementary material for: Sinapine-enriched rapeseed oils reduced fatty liver formation in high-fat diet-fed C57BL/6J mice
Source: Royal Society of Chemistry journal article supplement (doi:10.1039/d0ra00215a), 2020-01-01
Supplement: d0ra00215a1.pdf [file d0ra00215a1.pdf]

**Table S.** Diet compositions (g/kg diet).

| Groups<br>Composition | LF   |         | HF   |         | RO   |         | RP   |         |
|-----------------------|------|---------|------|---------|------|---------|------|---------|
|                       | g    | kcal    | g    | kcal    | g    | kcal    | g    | kcal    |
| corn starch           | 405  | 1397.25 | 195  | 672.75  | 195  | 672.75  | 195  | 672.75  |
| lard                  | –    | –       | 200  | 1794    | 100  | 897     | 100  | 897     |
| Rapeseed oil          | –    | –       | –    | –       | 100  | 899     | 100  | 899     |
| Soybean oil           | 45   | 397.8   | 45   | 397.8   | 45   | 397.8   | 45   | 397.8   |
| Casein                | 200  | 710     | 200  | 710     | 200  | 710     | 200  | 710     |
| Maltodextrin          | 150  | 600     | 150  | 600     | 150  | 600     | 150  | 600     |
| Cellulose             | 50   | 189     | 50   | 189     | 50   | 189     | 50   | 189     |
| Cholesterol           | –    | –       | 10   | 300     | 10   | 300     | 10   | 300     |
| DL-methionine         | 3    | 12      | 3    | 12      | 3    | 12      | 3    | 12      |
| Sucrose               | 100  | 389     | 100  | 389     | 100  | 389     | 100  | 389     |
| Choline chloride      | 2    | 8       | 2    | 8       | 2    | 8       | 2    | 8       |
| Mineral premix        | 35   | –       | 35   | –       | 35   | –       | 35   | –       |
| Vitamin premix        | 10   | –       | 10   | –       | 10   | –       | 10   | –       |
| Total                 | 1000 | 3703.05 | 1000 | 5072.55 | 1000 | 5074.55 | 1000 | 5074.55 |

Note: RP diet was prepared by 50 mg sinapine addition per 100g rapeseed oil first, then replaced 100g of lard in high fat diet.
